# Supplementary material for: Enhancement of Growth and Paramylon Production of Euglena gracilis by Upcycling of Spent Tomato Byproduct as an Alternative Medium
Source: MDPI journal article supplement (doi:10.3390/app11178182), 2021-09-03
Supplement: s1 [file s1]

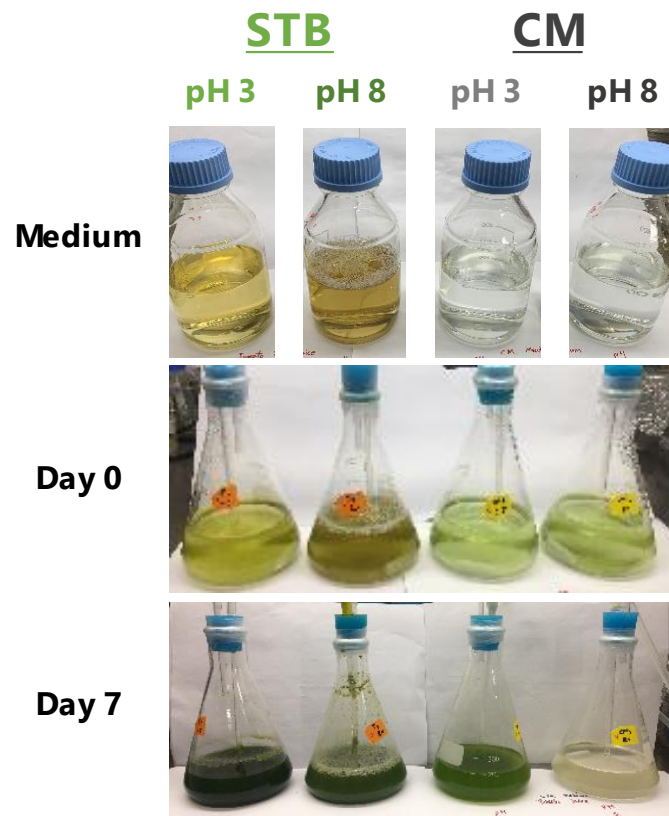

**Figure S1.** Medium and reactors throughout the cultivation period using STB and CM at different initial pH conditions.
